# Supplementary material
Source: PubMed Central journal article supplement (PMC6309928)

**Supplemental Materials**

**Supplemental Table I. Effects of *APOC3* R19X Mutation on Kinetic Parameters for plasma apoCIII and apoCII Metabolism.**

|                |          | <b>CC (±SD)</b> | <b>CT (±SD)</b> | <b>Difference</b> |
|----------------|----------|-----------------|-----------------|-------------------|
| <b>apoCIII</b> | VLDL FCR | 1.3±0.7         | 1.8±0.5         | 0.59±0.38         |
|                | HDL FCR  | 1.3±0.7         | 1.9±0.3         | 0.56±0.55         |
|                | VLDL PR  | 7.4±6           | 4.9±2           | -2.54±4.83        |
|                | HDL-PR   | 7.6±6           | 5±1             | -2.68±5.34        |
| <b>apoCII</b>  | VLDL FCR | 1.4±0.8         | 2.3±1           | 0.90±0.74         |
|                | HDL FCR  | 1.4±0.8         | 2.3±1           | 0.93±0.62         |
|                | VLDL PR  | 3.9±2           | 4.2±1           | 0.33±1.34         |
|                | HDL PR   | 4.0±2           | 4.4±1           | 0.41±1.31         |

**Supplemental Figure I. Apolipoprotein B100, VLDL TG and ApoCII/CIII Models**

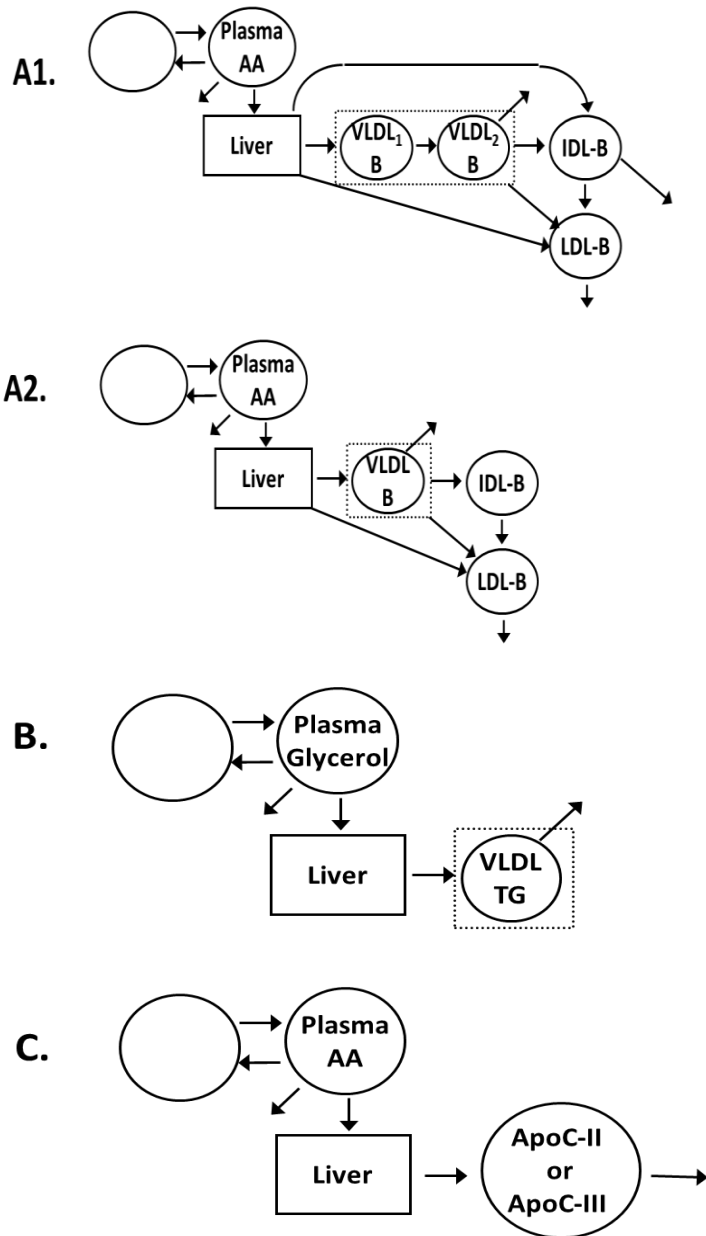

**Figure Legend:** A1: ApoB 100 full model, this model accounts for all pathways considered to model our stable isotope data, A2. ApoB100 model used in the present study, B. VLDL-TG model, ApoC-II and apoC-III model.

## Supplemental Table II. Apolipoprotein C2, Apolipoprotein C3, Leucine, Phenylalanine and Glycerol Stable Isotope Enrichment Curves for Study Sib Pairs.

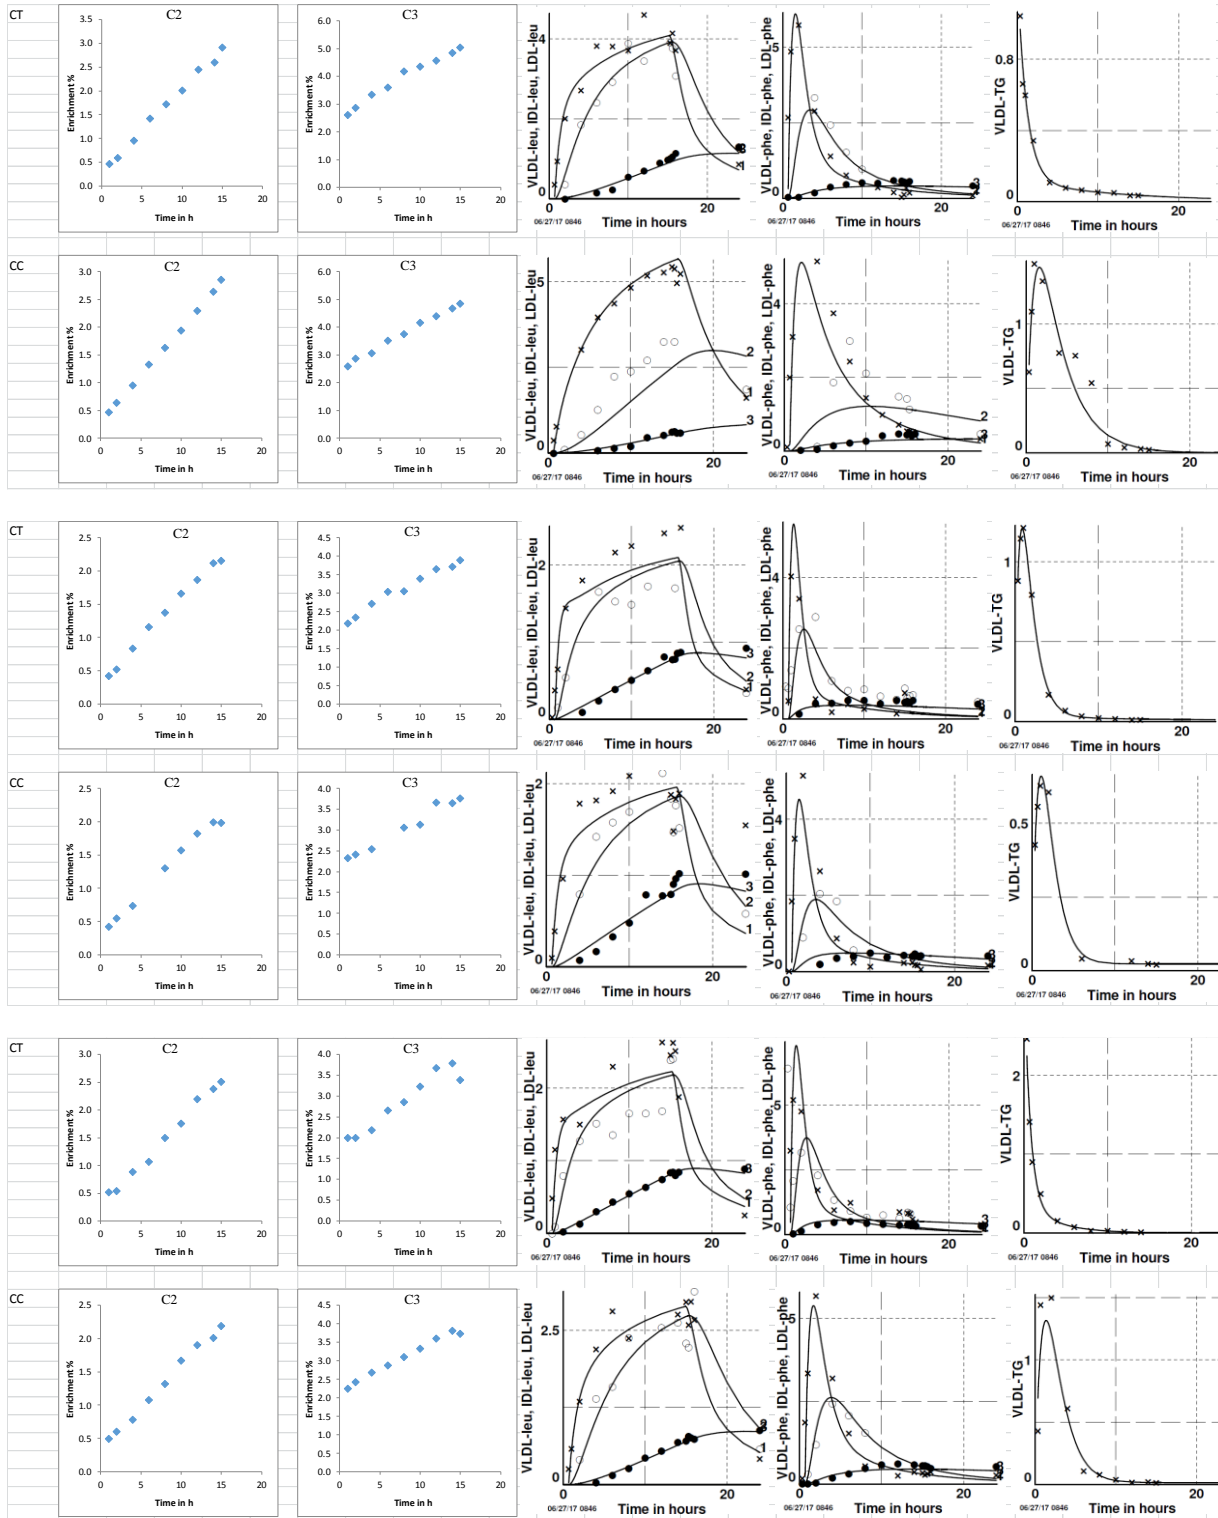

**Cont. Supplemental Table III. Apolipoprotein C2, Apolipoprotein C3, Leucine, Phenylalanine and Glycerol Stable Isotope Enrichment Curves for Study Sib Pairs.**

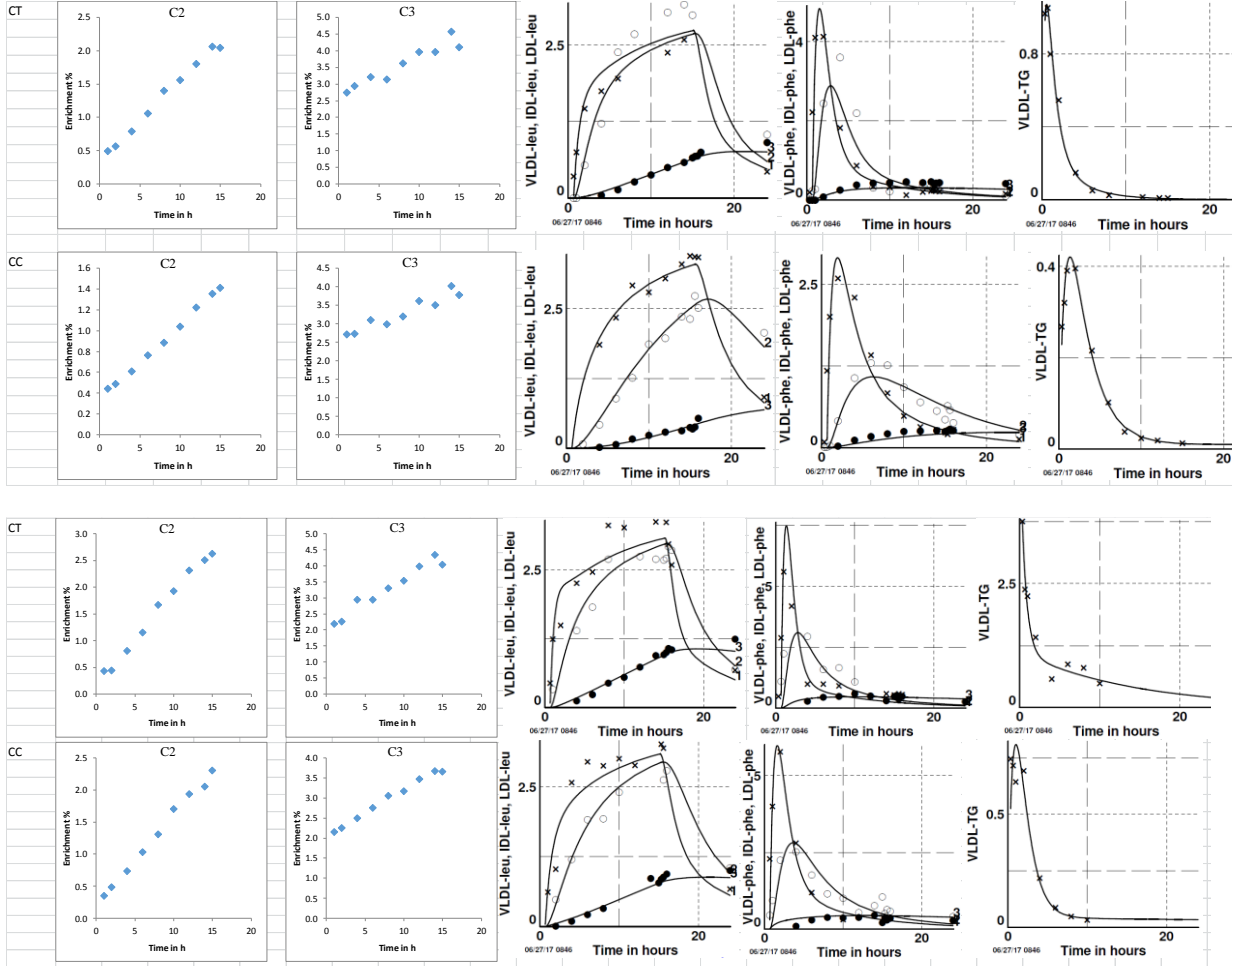

Supplement: NIHMS1511118-supplement-Supplemental_Material.pdf [file NIHMS1511118-supplement-Supplemental_Material.pdf]
